# Supplementary material
Source: ML conference proceedings conference paper supplement (https://www.ecva.net/papers/eccv_2022/papers_ECCV/html/136630248_ECCV_2022_paper.php)
Supplement: Supplementary file 2 [file 136630248-supp.zip]

Archive with 3 entries (2 files):
- 4426-supp/
- 4426-supp/4426-supp.mp4
- 4426-supp/4426-supp.pdf
